# Supplementary material for: Modulation of Hepatic Insulin and Glucagon Signaling by Nutritional Factors in Broiler Chicken
Source: MDPI journal article supplement (doi:10.3390/vetsci9030103), 2022-02-25
Supplement: s1 [file s1]

**Table S1.** Linear model coefficient estimates and their standard errors fitted to the gene expression and protein abundance data for each analyzed signaling element. (Petrilla\_et\_al\_Table\_S1)

| <b>Glucagon receptor</b>                   |                        |           |                          |           |
|--------------------------------------------|------------------------|-----------|--------------------------|-----------|
|                                            | <b>Gene expression</b> |           | <b>Protein abundance</b> |           |
|                                            | <b>Estimate</b>        | <b>SE</b> | <b>Estimate</b>          | <b>SE</b> |
| <b>Intercept</b>                           | 0.1543                 | 0.0422    | 1.3519                   | 0.2712    |
| <b>Cereal-WB</b>                           | 0.0195                 | 0.0596    | 1.0107                   | 0.3940    |
| <b>Protein-LP</b>                          | 0.0773                 | 0.0581    | -0.3828                  | 0.3835    |
| <b>Butyrate-But</b>                        | 0.0116                 | 0.0596    | -0.5123                  | 0.3835    |
| <b>Cereal-WB:Protein-LP</b>                | 0.1269                 | 0.0832    | -0.4942                  | 0.5498    |
| <b>Cereal-WB:Butyrate-But</b>              | 0.0549                 | 0.0832    | -0.8763                  | 0.5572    |
| <b>Protein-LP:Butyrate-But</b>             | -0.0125                | 0.0822    | 0.9769                   | 0.5423    |
| <b>Cereal-WB:Protein-LP:Butyrate-But</b>   | -0.1200                | 0.1162    | -0.0588                  | 0.7775    |
| <b>Insulin receptor <math>\beta</math></b> |                        |           |                          |           |
|                                            | <b>Gene expression</b> |           | <b>Protein abundance</b> |           |
|                                            | <b>Estimate</b>        | <b>SE</b> | <b>Estimate</b>          | <b>SE</b> |
| <b>Intercept</b>                           | 0.1485                 | 0.0444    | 0.7394                   | 0.0791    |
| <b>Cereal-WB</b>                           | -0.0808                | 0.0645    | 0.7673                   | 0.1118    |
| <b>Protein-LP</b>                          | -0.0163                | 0.0645    | -0.0206                  | 0.1090    |
| <b>Butyrate-But</b>                        | -0.0766                | 0.0645    | -0.2766                  | 0.1090    |
| <b>Cereal-WB:Protein-LP</b>                | 0.2426                 | 0.0924    | -0.5054                  | 0.1541    |
| <b>Cereal-WB:Butyrate-But</b>              | 0.2230                 | 0.0924    | -0.0714                  | 0.1541    |
| <b>Protein-LP:Butyrate-But</b>             | 0.0791                 | 0.0912    | 0.2660                   | 0.1521    |
| <b>Cereal-WB:Protein-LP:Butyrate-But</b>   | -0.4093                | 0.1317    | 0.2324                   | 0.2151    |
| <b>Mammalian target of rapamycin</b>       |                        |           |                          |           |
|                                            | <b>Gene expression</b> |           | <b>Protein abundance</b> |           |
|                                            | <b>Estimate</b>        | <b>SE</b> | <b>Estimate</b>          | <b>SE</b> |
| <b>Intercept</b>                           | 0.0035                 | 0.0013    | 1.1869                   | 0.4277    |
| <b>Cereal-WB</b>                           | 0.0013                 | 0.0017    | 0.7111                   | 0.6215    |
| <b>Protein-LP</b>                          | 0.0037                 | 0.0017    | 0.1169                   | 0.6049    |
| <b>Butyrate-But</b>                        | 0.0015                 | 0.0017    | -0.4869                  | 0.6416    |
| <b>Cereal-WB:Protein-LP</b>                | 0.0025                 | 0.0024    | 0.1240                   | 0.8672    |
| <b>Cereal-WB:Butyrate-But</b>              | -0.0010                | 0.0024    | 0.8517                   | 0.8932    |
| <b>Protein-LP:Butyrate-But</b>             | -0.0022                | 0.0024    | 0.9313                   | 0.8818    |
| <b>Cereal-WB:Protein-LP:Butyrate-But</b>   | -0.0015                | 0.0033    | -0.5158                  | 1.2368    |

WB: Wheat based diet supplemented with NSP-degrading xylanase and glucanase enzymes; LP: "Low protein" group reared on a diet with crude protein content reduced by 15 %, supplemented with limiting amino acids; But: Sodium butyrate supplementation of the diet in the dose of 1.5 g/kg diet; SE: Standard Error of the Estimate. Nutritional factors with colon in between show interactions (Cereal: Cereal type; Protein: Crude protein level; Butyrate: Butyrate supplementation). N=10 per group. Model fitting was performed with the *lm* built-in function of the R statistical programming environment (v4.0.3).

**Table S2.** ANOVA analysis results of the gene expression and protein abundance data for each analyzed signaling element. (Petrilla\_et\_al\_Table\_S2)

| <b>Glucagon receptor</b>                   |                     |                          |                     |                |
|--------------------------------------------|---------------------|--------------------------|---------------------|----------------|
| <b>Gene expression</b>                     |                     | <b>Protein abundance</b> |                     |                |
|                                            | <b>F statistics</b> | <b>P value</b>           | <b>F statistics</b> | <b>P value</b> |
| <b>Cereal type</b>                         | 7.8132              | 0.0067*                  | 2.4425              | 0.1226         |
| <b>Crude protein level</b>                 | 12.5253             | 0.0007*                  | 0.5888              | 0.4455         |
| <b>Butyrate supplement.</b>                | 0.0082              | 0.9279                   | 5.4513              | 0.0224*        |
| <b>Cereal:Protein</b>                      | 1.2630              | 0.2650                   | 1.8139              | 0.1824         |
| <b>Cereal:Butyrate</b>                     | 0.0134              | 0.9083                   | 5.4408              | 0.0226*        |
| <b>Protein:Butyrate</b>                    | 1.5586              | 0.2162                   | 5.9535              | 0.0172*        |
| <b>Cereal:Protein:Butyrate</b>             | 1.0672              | 0.3052                   | 0.0057              | 0.9399         |
| <b>Insulin receptor <math>\beta</math></b> |                     |                          |                     |                |
| <b>Gene expression</b>                     |                     | <b>Protein abundance</b> |                     |                |
|                                            | <b>F statistics</b> | <b>P value</b>           | <b>F statistics</b> | <b>P value</b> |
| <b>Cereal type</b>                         | 2.1432              | 0.1480                   | 97.7768             | <0.0001*       |
| <b>Crude protein level</b>                 | 1.7829              | 0.1865                   | 2.0532              | 0.1563         |
| <b>Butyrate supplement.</b>                | 0.6197              | 0.4340                   | 4.6587              | 0.0343*        |
| <b>Cereal:Protein</b>                      | 0.3916              | 0.5336                   | 12.8919             | 0.0006*        |
| <b>Cereal:Butyrate</b>                     | 0.1074              | 0.7442                   | 0.1993              | 0.6567         |
| <b>Protein:Butyrate</b>                    | 3.1747              | 0.0795                   | 12.6278             | 0.0007*        |
| <b>Cereal:Protein:Butyrate</b>             | 9.6671              | 0.0028*                  | 1.1677              | 0.2836         |
| <b>Mammalian target of rapamycin</b>       |                     |                          |                     |                |
| <b>Gene expression</b>                     |                     | <b>Protein abundance</b> |                     |                |
|                                            | <b>F statistics</b> | <b>P value</b>           | <b>F statistics</b> | <b>P value</b> |
| <b>Cereal type</b>                         | 4.1528              | 0.0456*                  | 11.7942             | 0.0010*        |
| <b>Crude protein level</b>                 | 17.4478             | <0.0001*                 | 2.6624              | 0.1073         |
| <b>Butyrate supplement.</b>                | 0.3849              | 0.5371                   | 0.9219              | 0.3403         |
| <b>Cereal:Protein</b>                      | 1.1052              | 0.2970                   | 0.0440              | 0.8346         |
| <b>Cereal:Butyrate</b>                     | 1.1016              | 0.2977                   | 0.8895              | 0.3489         |
| <b>Protein:Butyrate</b>                    | 3.1432              | 0.0809                   | 1.1711              | 0.2829         |
| <b>Cereal:Protein:Butyrate</b>             | 0.1997              | 0.6565                   | 0.1739              | 0.6780         |

F statistics and P values are given in the corresponding columns. The study was conducted with two types of cereal (wheat-based diet supplemented with NSP-degrading xylanase and glucanase enzymes [WB] or maize-based diet [MB]), normal (NP) or lowered crude protein level (LP; reduced by 15 %, supplemented with limiting amino acids), and with or without sodium (n-)butyrate supplementation (1.5 g/kg diet). Main effects were determined as follows: WB vs. MB diet (Cereal type), LP vs. NP groups (Crude protein level) and butyrate supplementation vs. no added butyrate (Butyrate supplement.). Nutritional factors with colon in between show interactions (Cereal: Cereal type; Protein: Crude protein level; Butyrate: Butyrate supplement.). N=10 per group. Asterisk (\*) indicates statistically significant effects ( $P < 0.05$ ). Calculations were performed with the *Anova* function in the *car* package of the R statistical programming environment (v4.0.3).

**Table S3.** *Post hoc* pairwise comparisons of the different treatment groups of the glucagon receptor gene expression data. (Petrilla\_et\_al\_Table\_S3)

| Contrast              | Estimate | SE     | CI                 | DF | t value | P value |
|-----------------------|----------|--------|--------------------|----|---------|---------|
| MB NP Ctr – MB LP Ctr | -0.0773  | 0.0581 | (-0.2589, 0.1044)  | 68 | -1.330  | 0.8841  |
| MB NP Ctr – WB NP Ctr | -0.0195  | 0.0596 | (-0.2059, 0.1669)  | 68 | -0.327  | >0.9999 |
| MB NP Ctr – WB LP Ctr | -0.2236  | 0.0596 | (-0.4100, -0.0372) | 68 | -3.752  | 0.0083* |
| MB NP Ctr – MB NP But | -0.0116  | 0.0596 | (-0.1980, 0.1748)  | 68 | -0.195  | >0.9999 |
| MB NP Ctr – MB LP But | -0.0764  | 0.0581 | (-0.2580, 0.1053)  | 68 | -1.315  | 0.8902  |
| MB NP Ctr – WB NP But | -0.0860  | 0.0581 | (-0.2677, 0.0957)  | 68 | -1.480  | 0.8150  |
| MB NP Ctr – WB LP But | -0.1576  | 0.0581 | (-0.3393, 0.0241)  | 68 | -2.713  | 0.1366  |
| MP LP Ctr – WB NP Ctr | 0.0578   | 0.0581 | (-0.1239, 0.2394)  | 68 | 0.994   | 0.9738  |
| MP LP Ctr – WB LP Ctr | -0.1464  | 0.0581 | (-0.3280, 0.0353)  | 68 | -2.519  | 0.2051  |
| MP LP Ctr – MB NP But | 0.0656   | 0.0581 | (-0.1160, 0.2473)  | 68 | 1.130   | 0.9479  |
| MP LP Ctr – MB LP But | 0.0009   | 0.0565 | (-0.1759, 0.1777)  | 68 | 0.016   | >0.9999 |
| MP LP Ctr – WB NP But | -0.0087  | 0.0565 | (-0.1856, 0.1681)  | 68 | -0.155  | >0.9999 |
| MP LP Ctr – WB LP But | -0.0803  | 0.0565 | (-0.2571, 0.0965)  | 68 | -1.420  | 0.8447  |
| WB NP Ctr – WB LP Ctr | -0.2041  | 0.0596 | (-0.3905, -0.0177) | 68 | -3.425  | 0.0221* |
| WB NP Ctr – MB NP But | 0.0079   | 0.0596 | (-0.1785, 0.1943)  | 68 | 0.132   | >0.9999 |
| WB NP Ctr – MB LP But | -0.0569  | 0.0581 | (-0.2385, 0.1248)  | 68 | -0.979  | 0.9759  |
| WB NP Ctr – WB NP But | -0.0665  | 0.0581 | (-0.2482, 0.1152)  | 68 | -1.145  | 0.9442  |
| WB NP Ctr – WB LP But | -0.1381  | 0.0581 | (-0.3197, 0.0436)  | 68 | -2.377  | 0.2694  |
| WB LP Ctr – MB NP But | 0.2120   | 0.0596 | (0.0256, 0.3984)   | 68 | 3.557   | 0.0150* |
| WB LP Ctr – MB LP But | 0.1473   | 0.0581 | (-0.0344, 0.3289)  | 68 | 2.535   | 0.1989  |
| WB LP Ctr – WB NP But | 0.1376   | 0.0581 | (-0.0440, 0.3193)  | 68 | 2.369   | 0.2733  |
| WB LP Ctr – WB LP But | 0.0660   | 0.0581 | (-0.1156, 0.2477)  | 68 | 1.137   | 0.9462  |
| MB NP But – MB LP But | -0.0648  | 0.0581 | (-0.2464, 0.1169)  | 68 | -1.115  | 0.9514  |
| MB NP But – WB NP But | -0.0744  | 0.0581 | (-0.2561, 0.1073)  | 68 | -1.280  | 0.9030  |
| MB NP But – WB LP But | -0.1460  | 0.0581 | (-0.3276, 0.0357)  | 68 | -2.513  | 0.2080  |
| MB LP But – WB NP But | -0.0096  | 0.0565 | (-0.1865, 0.1672)  | 68 | -0.170  | >0.9999 |
| MB LP But – WB LP But | -0.0812  | 0.0565 | (-0.2580, 0.0956)  | 68 | -1.436  | 0.8371  |
| WB NP But – WB LP But | -0.0716  | 0.0565 | (-0.2484, 0.1052)  | 68 | -1.266  | 0.9081  |

The calculated difference of the estimated marginal means of the treatment groups compared (Contrast) can be found in the column Estimate, alongside with its standard error and confidence interval (columns SE and CI, respectively). Degrees of freedom (DF), t value and P values can be found in their corresponding columns. Asterisk (\*) indicates statistically significant differences ( $P < 0.05$ ). Pairwise comparisons were performed by the *emmeans* package of the R statistical programming environment (v4.0.3), P values and confidence intervals were adjusted with the Tukey method.

**Table S4.** *Post hoc* pairwise comparisons of the different treatment groups of the glucagon receptor protein abundance data. (Petrilla\_et\_al\_Table\_S4)

| Contrast              | Estimate | SE    | CI               | DF | t value | P value |
|-----------------------|----------|-------|------------------|----|---------|---------|
| MB NP Ctr – MB LP Ctr | 0.3828   | 0.383 | (-0.815, 1.581)  | 70 | 0.998   | 0.9732  |
| MB NP Ctr – WB NP Ctr | -1.0107  | 0.394 | (-2.242, 0.220)  | 70 | -2.565  | 0.1864  |
| MB NP Ctr – WB LP Ctr | -0.1337  | 0.383 | (-1.332, 1.064)  | 70 | -0.349  | >0.9999 |
| MB NP Ctr – MB NP But | 0.5123   | 0.383 | (-0.686, 1.711)  | 70 | 1.336   | 0.8818  |
| MB NP Ctr – MB LP But | -0.0817  | 0.383 | (-1.280, 1.116)  | 70 | -0.213  | >0.9999 |
| MB NP Ctr – WB NP But | 0.3779   | 0.394 | (-0.853, 1.609)  | 70 | 0.959   | 0.9786  |
| MB NP Ctr – WB LP But | 0.3369   | 0.383 | (-0.861, 1.535)  | 70 | 0.878   | 0.9871  |
| MP LP Ctr – WB NP Ctr | -1.3935  | 0.394 | (-2.625, -0.163) | 70 | -3.537  | 0.0157* |
| MP LP Ctr – WB LP Ctr | -0.5165  | 0.383 | (-1.715, 0.682)  | 70 | -1.347  | 0.8774  |
| MP LP Ctr – MB NP But | 0.1295   | 0.383 | (-1.069, 1.328)  | 70 | 0.338   | >0.9999 |
| MP LP Ctr – MB LP But | -0.4645  | 0.383 | (-1.663, 0.734)  | 70 | -1.211  | 0.9259  |
| MP LP Ctr – WB NP But | -0.0049  | 0.394 | (-1.236, 1.226)  | 70 | -0.012  | >0.9999 |
| MP LP Ctr – WB LP But | -0.0459  | 0.383 | (-1.244, 1.152)  | 70 | -0.120  | >0.9999 |
| WB NP Ctr – WB LP Ctr | 0.8770   | 0.394 | (-0.354, 2.108)  | 70 | 2.226   | 0.3494  |
| WB NP Ctr – MB NP But | 1.5231   | 0.394 | (0.292, 2.754)   | 70 | 3.866   | 0.0057* |

|                       |         |       |                 |    |        |         |
|-----------------------|---------|-------|-----------------|----|--------|---------|
| WB NP Ctr – MB LP But | 0.9290  | 0.394 | (-0.302, 2.160) | 70 | 2.358  | 0.2783  |
| WB NP Ctr – WB NP But | 1.3886  | 0.404 | (0.126, 2.652)  | 70 | 3.435  | 0.0212* |
| WB NP Ctr – WB LP But | 1.3476  | 0.394 | (0.117, 2.579)  | 70 | 3.420  | 0.0221* |
| WB LP Ctr – MB NP But | 0.6461  | 0.383 | (-0.552, 1.844) | 70 | 1.685  | 0.6969  |
| WB LP Ctr – MB LP But | 0.0520  | 0.383 | (-1.146, 1.250) | 70 | 0.136  | >0.9999 |
| WB LP Ctr – WB NP But | 0.5116  | 0.394 | (-0.719, 1.743) | 70 | 1.299  | 0.8964  |
| WB LP Ctr – WB LP But | 0.4706  | 0.383 | (-0.728, 1.669) | 70 | 1.227  | 0.9210  |
| MB NP But – MB LP But | -0.5941 | 0.383 | (-1.792, 0.604) | 70 | -1.549 | 0.7780  |
| MB NP But – WB NP But | -0.1344 | 0.394 | (-1.365, 1.097) | 70 | -0.341 | >0.9999 |
| MB NP But – WB LP But | -0.1755 | 0.383 | (-1.374, 1.023) | 70 | -0.458 | 0.9998  |
| MB LP But – WB NP But | 0.4596  | 0.394 | (-0.771, 1.691) | 70 | 1.167  | 0.9386  |
| MB LP But – WB LP But | 0.4186  | 0.383 | (-0.780, 1.617) | 70 | 1.092  | 0.9565  |
| WB NP But – WB LP But | -0.0411 | 0.394 | (-1.272, 1.190) | 70 | -0.104 | >0.9999 |

The calculated difference of the estimated marginal means of the treatment groups compared (Contrast) can be found in the column Estimate, alongside with its standard error and confidence interval (columns SE and CI, respectively). Degrees of freedom (DF), t value and P values can be found in their corresponding columns. Asterisk (\*) indicates statistically significant differences ( $P < 0.05$ ). Pairwise comparisons were performed by the *emmeans* package of the R statistical programming environment (v4.0.3), P values and confidence intervals were adjusted with the Tukey method.

**Table S5.** *Post hoc* pairwise comparisons of the different treatment groups of the insulin receptor  $\beta$  gene expression data. (Petrilla\_et\_al\_Table\_S5)

| Contrast              | Estimate | SE     | CI                 | DF | t value | P value |
|-----------------------|----------|--------|--------------------|----|---------|---------|
| MB NP Ctr – MB LP Ctr | 0.0163   | 0.0645 | (-0.1856, 0.2181)  | 65 | 0.252   | >0.9999 |
| MB NP Ctr – WB NP Ctr | 0.0808   | 0.0645 | (-0.1210, 0.2827)  | 65 | 1.254   | 0.9120  |
| MB NP Ctr – WB LP Ctr | -0.1455  | 0.0645 | (-0.3474, 0.0563)  | 65 | -2.258  | 0.3326  |
| MB NP Ctr – MB NP But | 0.0766   | 0.0645 | (-0.1253, 0.2785)  | 65 | 1.189   | 0.9324  |
| MB NP Ctr – MB LP But | 0.0138   | 0.0627 | (-0.1827, 0.2103)  | 65 | 0.220   | >0.9999 |
| MB NP Ctr – WB NP But | -0.0655  | 0.0645 | (-0.2674, 0.1363)  | 65 | -1.017  | 0.9702  |
| MB NP Ctr – WB LP But | 0.0383   | 0.0665 | (-0.1701, 0.2467)  | 65 | 0.576   | 0.9991  |
| MP LP Ctr – WB NP Ctr | 0.0646   | 0.0661 | (-0.1425, 0.2717)  | 65 | 0.977   | 0.9762  |
| MP LP Ctr – WB LP Ctr | -0.1619  | 0.0661 | (-0.3689, 0.0453)  | 65 | -2.446  | 0.2374  |
| MP LP Ctr – MB NP But | 0.0604   | 0.0661 | (-0.1467, 0.2675)  | 65 | 0.913   | 0.9838  |
| MP LP Ctr – MB LP But | -0.0025  | 0.0645 | (-0.2043, 0.1994)  | 65 | -0.038  | >0.9999 |
| MP LP Ctr – WB NP But | -0.0818  | 0.0661 | (-0.2889, 0.1253)  | 65 | -1.237  | 0.9177  |
| MP LP Ctr – WB LP But | 0.0221   | 0.0682 | (-0.1914, 0.2356)  | 65 | 0.324   | >0.9999 |
| WB NP Ctr – WB LP Ctr | -0.2264  | 0.0661 | (-0.4335, -0.0192) | 65 | -3.423  | 0.0226* |
| WB NP Ctr – MB NP But | -0.0042  | 0.0661 | (-0.2113, 0.2029)  | 65 | -0.064  | >0.9999 |
| WB NP Ctr – MB LP But | -0.0671  | 0.0645 | (-0.2689, 0.1348)  | 65 | -1.040  | 0.9663  |
| WB NP Ctr – WB NP But | -0.1464  | 0.0661 | (-0.3535, 0.0607)  | 65 | -2.213  | 0.3577  |
| WB NP Ctr – WB LP But | -0.0425  | 0.0682 | (-0.2560, 0.1710)  | 65 | -0.624  | 0.9984  |
| WB LP Ctr – MB NP But | 0.2222   | 0.0661 | (0.0150, 0.4293)   | 65 | 3.359   | 0.0270* |
| WB LP Ctr – MB LP But | 0.1593   | 0.0645 | (-0.0426, 0.3612)  | 65 | 2.472   | 0.2261  |
| WB LP Ctr – WB NP But | 0.0800   | 0.0661 | (-0.1271, 0.2871)  | 65 | 1.210   | 0.9262  |
| WB LP Ctr – WB LP But | 0.1839   | 0.0682 | (-0.0296, 0.3973)  | 65 | 2.697   | 0.1421  |
| MB NP But – MB LP But | -0.0628  | 0.0645 | (-0.2647, 0.1390)  | 65 | -0.975  | 0.9765  |
| MB NP But – WB NP But | -0.1422  | 0.0661 | (-0.3493, 0.0650)  | 65 | -2.150  | 0.3954  |
| MB NP But – WB LP But | -0.0383  | 0.0682 | (-0.2518, 0.1752)  | 65 | -0.562  | 0.9992  |
| MB LP But – WB NP But | -0.0793  | 0.0645 | (-0.2812, 0.1225)  | 65 | -1.231  | 0.9197  |
| MB LP But – WB LP But | 0.0245   | 0.0665 | (-0.1839, 0.2329)  | 65 | 0.369   | >0.9999 |
| WB NP But – WB LP But | 0.1039   | 0.0682 | (-0.1096, 0.3174)  | 65 | 1.524   | 0.7919  |

The calculated difference of the estimated marginal means of the treatment groups compared (Contrast) can be found in the column Estimate, alongside with its standard error and confidence interval (columns SE and CI, respectively). Degrees of freedom (DF), t value and P values can be found in their corresponding columns. Asterisk (\*) indicates statistically significant differences ( $P < 0.05$ ). Pairwise comparisons were performed by the *emmeans* package of the R statistical programming environment (v4.0.3), P values and confidence intervals were adjusted with the Tukey method.

**Table S6.** *Post hoc* pairwise comparisons of the different treatment groups of the insulin receptor  $\beta$  protein abundance data. (Petrilla\_et\_al\_Table\_S6)

| Contrast              | Estimate | SE    | CI                 | DF | t value | P value |
|-----------------------|----------|-------|--------------------|----|---------|---------|
| MB NP Ctr – MB LP Ctr | 0.0206   | 0.109 | (-0.3199, 0.3611)  | 70 | 0.189   | >0.9999 |
| MB NP Ctr – WB NP Ctr | -0.7673  | 0.112 | (-1.1167, -0.4180) | 70 | -6.862  | <.0001* |
| MB NP Ctr – WB LP Ctr | -0.2414  | 0.109 | (-0.5819, 0.0992)  | 70 | -2.215  | 0.3560  |
| MB NP Ctr – MB NP But | 0.2766   | 0.109 | (-0.0639, 0.6171)  | 70 | 2.538   | 0.1972  |
| MB NP Ctr – MB LP But | 0.0312   | 0.109 | (-0.3093, 0.3718)  | 70 | 0.287   | >0.9999 |
| MB NP Ctr – WB NP But | -0.4194  | 0.109 | (-0.7599, -0.0788) | 70 | -3.848  | 0.0060* |
| MB NP Ctr – WB LP But | -0.3918  | 0.109 | (-1.1285, -0.0513) | 70 | -3.595  | 0.0132* |
| MP LP Ctr – WB NP Ctr | -0.7879  | 0.109 | (-1.1285, -0.4474) | 70 | -7.229  | <.0001* |
| MP LP Ctr – WB LP Ctr | -0.2620  | 0.106 | (-0.5934, 0.0695)  | 70 | -2.469  | 0.2258  |
| MP LP Ctr – MB NP But | 0.2560   | 0.106 | (-0.0755, 0.5875)  | 70 | 2.413   | 0.2514  |
| MP LP Ctr – MB LP But | 0.0106   | 0.106 | (-0.3208, 0.3421)  | 70 | 0.100   | >0.9999 |
| MP LP Ctr – WB NP But | -0.4400  | 0.106 | (-0.7714, -0.1085) | 70 | -4.147  | 0.0023* |
| MP LP Ctr – WB LP But | -0.4124  | 0.106 | (-0.7439, -0.0809) | 70 | -3.887  | 0.0053* |
| WB NP Ctr – WB LP Ctr | 0.5260   | 0.109 | (0.1854, 0.8665)   | 70 | 4.826   | 0.0002* |
| WB NP Ctr – MB NP But | 1.0439   | 0.109 | (0.7034, 1.3845)   | 70 | 9.578   | <.0001* |
| WB NP Ctr – MB LP But | 0.7986   | 0.109 | (0.4580, 1.1391)   | 70 | 7.327   | <.0001* |
| WB NP Ctr – WB NP But | 0.3480   | 0.109 | (0.0074, 0.6885)   | 70 | 3.193   | 0.0417* |
| WB NP Ctr – WB LP But | 0.3755   | 0.109 | (0.0350, 0.7161)   | 70 | 3.445   | 0.0206* |
| WB LP Ctr – MB NP But | 0.5180   | 0.106 | (0.1865, 0.8494)   | 70 | 4.883   | 0.0002* |
| WB LP Ctr – MB LP But | 0.2726   | 0.106 | (-0.0589, 0.6041)  | 70 | 2.570   | 0.1848  |
| WB LP Ctr – WB NP But | -0.1780  | 0.106 | (-0.5095, 0.1535)  | 70 | -1.678  | 0.7011  |
| WB LP Ctr – WB LP But | -0.1504  | 0.106 | (-0.4819, 0.1810)  | 70 | -1.418  | 0.8459  |
| MB NP But – MB LP But | -0.2454  | 0.106 | (-0.5768, 0.0861)  | 70 | -2.313  | 0.3015  |
| MB NP But – WB NP But | -0.6960  | 0.106 | (-1.0274, -0.3645) | 70 | -6.561  | <.0001* |
| MB NP But – WB LP But | -0.6684  | 0.106 | (-0.9999, -0.3369) | 70 | -6.301  | <.0001* |
| MB LP But – WB NP But | -0.4506  | 0.106 | (-0.7821, -0.1192) | 70 | -4.248  | 0.0016* |
| MB LP But – WB LP But | -0.4230  | 0.106 | (-0.7545, -0.0916) | 70 | -3.988  | 0.0038* |
| WB NP But – WB LP But | 0.0276   | 0.106 | (-0.3039, 0.3590)  | 70 | 0.260   | >0.9999 |

The calculated difference of the estimated marginal means of the treatment groups compared (Contrast) can be found in the column Estimate, alongside with its standard error and confidence interval (columns SE and CI, respectively). Degrees of freedom (DF), t value and P values can be found in their corresponding columns. Asterisk (\*) indicates statistically significant differences ( $P < 0.05$ ). Pairwise comparisons were performed by the *emmeans* package of the R statistical programming environment (v4.0.3), P values and confidence intervals were adjusted with the Tukey method.

**Table S7.** *Post hoc* pairwise comparisons of the different treatment groups of the mammalian target of rapamycin gene expression data. (Petrilla\_et\_al\_Table\_S7)

| Contrast              | Estimate | SE      | CI                 | DF | t value | P value |
|-----------------------|----------|---------|--------------------|----|---------|---------|
| MB NP Ctr – MB LP Ctr | -0.0037  | 0.00174 | (-0.0092, 0.0017)  | 66 | -2.146  | 0.3977  |
| MB NP Ctr – WB NP Ctr | -0.0013  | 0.00174 | (-0.0068, 0.0041)  | 66 | -0.756  | 0.9947  |
| MB NP Ctr – WB LP Ctr | -0.0076  | 0.00174 | (-0.0130, -0.0021) | 66 | -4.360  | 0.0012* |
| MB NP Ctr – MB NP But | -0.0015  | 0.00174 | (-0.0069, 0.0040)  | 66 | -0.860  | 0.9885  |
| MB NP Ctr – MB LP But | -0.0030  | 0.00170 | (-0.0084, 0.0023)  | 66 | -1.789  | 0.6296  |
| MB NP Ctr – WB NP But | -0.0018  | 0.00170 | (-0.0071, 0.0035)  | 66 | -1.076  | 0.9597  |
| MB NP Ctr – WB LP But | -0.0044  | 0.00170 | (-0.0097, 0.0009)  | 66 | -2.600  | 0.1745  |
| MP LP Ctr – WB NP Ctr | 0.0024   | 0.00169 | (-0.0029, 0.0077)  | 66 | 1.433   | 0.8387  |
| MP LP Ctr – WB LP Ctr | -0.0039  | 0.00169 | (-0.0091, 0.0014)  | 66 | -2.283  | 0.3185  |
| MP LP Ctr – MB NP But | 0.0022   | 0.00169 | (-0.0030, 0.0075)  | 66 | 1.325   | 0.8860  |
| MP LP Ctr – MB LP But | 0.0007   | 0.00165 | (-0.0045, 0.0058)  | 66 | 0.422   | 0.9999  |
| MP LP Ctr – WB NP But | 0.0019   | 0.00165 | (-0.0032, 0.0071)  | 66 | 1.158   | 0.9406  |

|                       |         |         |                    |    |        |         |
|-----------------------|---------|---------|--------------------|----|--------|---------|
| MP LP Ctr – WB LP But | -0.0007 | 0.00165 | (-0.0058, 0.0045)  | 66 | -0.415 | 0.9999  |
| WB NP Ctr – WB LP Ctr | -0.0063 | 0.00169 | (-0.0116, -0.0010) | 66 | -3.716 | 0.0094* |
| WB NP Ctr – MB NP But | -0.0002 | 0.00169 | (-0.0055, 0.0051)  | 66 | -0.108 | >0.9999 |
| WB NP Ctr – MB LP But | -0.0017 | 0.00165 | (-0.0069, 0.0034)  | 66 | -1.048 | 0.9650  |
| WB NP Ctr – WB NP But | -0.0005 | 0.00165 | (-0.0057, 0.0046)  | 66 | -0.312 | >0.9999 |
| WB NP Ctr – WB LP But | -0.0031 | 0.00165 | (-0.0083, 0.0020)  | 66 | -1.885 | 0.5657  |
| WB LP Ctr – MB NP But | 0.0061  | 0.00169 | (0.0008, 0.0114)   | 66 | 3.608  | 0.0131* |
| WB LP Ctr – MB LP But | 0.0045  | 0.00165 | (-0.0006, 0.0097)  | 66 | 2.764  | 0.1221  |
| WB LP Ctr – WB NP But | 0.0058  | 0.00165 | (0.0006, 0.0109)   | 66 | 3.501  | 0.0179* |
| WB LP Ctr – WB LP But | 0.0032  | 0.00165 | (-0.0020, 0.0083)  | 66 | 1.927  | 0.5379  |
| MB NP But – MB LP But | -0.0015 | 0.00165 | (-0.0067, 0.0036)  | 66 | -0.937 | 0.9811  |
| MB NP But – WB NP But | -0.0003 | 0.00165 | (-0.0055, 0.0048)  | 66 | -0.201 | >0.9999 |
| MB NP But – WB LP But | -0.0029 | 0.00165 | (-0.0081, 0.0022)  | 66 | -1.775 | 0.6391  |
| MB LP But – WB NP But | 0.0012  | 0.00160 | (-0.0038, 0.0062)  | 66 | 0.757  | 0.9947  |
| MB LP But – WB LP But | -0.0014 | 0.00160 | (-0.0064, 0.0036)  | 66 | -0.860 | 0.9885  |
| WB NP But – WB LP But | -0.0026 | 0.00160 | (-0.0076, 0.0024)  | 66 | -1.617 | 0.7386  |

The calculated difference of the estimated marginal means of the treatment groups compared (Contrast) can be found in the column Estimate, alongside with its standard error and confidence interval (columns SE and CI, respectively). Degrees of freedom (DF), t value and P values can be found in their corresponding columns. Asterisk (\*) indicates statistically significant differences ( $P < 0.05$ ). Pairwise comparisons were performed by the *emmeans* package of the R statistical programming environment (v4.0.3), P values and confidence intervals were adjusted with the Tukey method.

**Table S8.** *Post hoc* pairwise comparisons of the different treatment groups of the mammalian target of rapamycin protein abundance data. (Petrilla\_et\_al\_Table\_S8)

| Contrast              | Estimate | SE    | CI               | DF | t value | P value |
|-----------------------|----------|-------|------------------|----|---------|---------|
| MB NP Ctr – MB LP Ctr | -0.117   | 0.605 | (-2.008, 1.774)  | 69 | -0.193  | >0.9999 |
| MB NP Ctr – WB NP Ctr | -0.711   | 0.621 | (-2.654, 1.232)  | 69 | -1.144  | 0.9444  |
| MB NP Ctr – WB LP Ctr | -0.952   | 0.605 | (-2.843, 0.939)  | 69 | -1.574  | 0.7640  |
| MB NP Ctr – MB NP But | 0.487    | 0.642 | (-1.519, 2.492)  | 69 | 0.759   | 0.9946  |
| MB NP Ctr – MB LP But | -0.561   | 0.605 | (-2.452, 1.330)  | 69 | -0.928  | 0.9823  |
| MB NP Ctr – WB NP But | -1.076   | 0.605 | (-2.967, 0.815)  | 69 | -1.779  | 0.6363  |
| MB NP Ctr – WB LP But | -1.732   | 0.605 | (-3.623, 0.159)  | 69 | -2.864  | 0.0963  |
| MP LP Ctr – WB NP Ctr | -0.594   | 0.621 | (-2.537, 1.348)  | 69 | -0.956  | 0.9790  |
| MP LP Ctr – WB LP Ctr | -0.835   | 0.605 | (-2.726, 1.056)  | 69 | -1.380  | 0.8630  |
| MP LP Ctr – MB NP But | 0.604    | 0.642 | (-1.402, 2.609)  | 69 | 0.941   | 0.9808  |
| MP LP Ctr – MB LP But | -0.444   | 0.605 | (-2.335, 1.446)  | 69 | -0.735  | 0.9956  |
| MP LP Ctr – WB NP But | -0.959   | 0.605 | (-2.850, 0.932)  | 69 | -1.585  | 0.7572  |
| MP LP Ctr – WB LP But | -1.615   | 0.605 | (-3.506, 0.275)  | 69 | -2.671  | 0.1495  |
| WB NP Ctr – WB LP Ctr | -0.241   | 0.621 | (-2.183, 1.702)  | 69 | -0.388  | 0.9999  |
| WB NP Ctr – MB NP But | 1.198    | 0.657 | (-0.856, 3.252)  | 69 | 1.823   | 0.6071  |
| WB NP Ctr – MB LP But | 0.150    | 0.621 | (-1.793, 2.092)  | 69 | 0.241   | >0.9999 |
| WB NP Ctr – WB NP But | -0.365   | 0.621 | (-2.307, 1.578)  | 69 | -0.587  | 0.9989  |
| WB NP Ctr – WB LP But | -1.021   | 0.621 | (-2.964, 0.921)  | 69 | -1.643  | 0.7227  |
| WB LP Ctr – MB NP But | 1.439    | 0.642 | (-0.567, 3.444)  | 69 | 2.243   | 0.3402  |
| WB LP Ctr – MB LP But | 0.391    | 0.605 | (-1.500, 2.281)  | 69 | 0.646   | 0.9980  |
| WB LP Ctr – WB NP But | -0.124   | 0.605 | (-2.015, 1.767)  | 69 | -0.205  | >0.9999 |
| WB LP Ctr – WB LP But | -0.780   | 0.605 | (-2.671, 1.110)  | 69 | -1.290  | 0.8995  |
| MB NP But – MB LP But | -1.048   | 0.642 | (-3.054, 0.957)  | 69 | -1.634  | 0.7284  |
| MB NP But – WB NP But | -1.563   | 0.642 | (-3.568, 0.443)  | 69 | -2.436  | 0.2411  |
| MB NP But – WB LP But | -2.219   | 0.642 | (-4.225, -0.214) | 69 | -3.459  | 0.0199* |
| MB LP But – WB NP But | -0.515   | 0.605 | (-2.405, 1.376)  | 69 | -0.851  | 0.9893  |
| MB LP But – WB LP But | -1.171   | 0.605 | (-3.062, 0.720)  | 69 | -1.936  | 0.5318  |
| WB NP But – WB LP But | -0.656   | 0.605 | (-2.547, 1.234)  | 69 | -1.085  | 0.9579  |

The calculated difference of the estimated marginal means of the treatment groups compared (Contrast) can be found in the column Estimate, alongside with its standard error and confidence interval (columns SE and CI, respectively). Degrees of freedom (DF), t value and P values can be found in their corresponding columns. Asterisk (\*) indicates statistically significant differences ( $P < 0.05$ ).

significant differences ( $P < 0.05$ ). Pairwise comparisons were performed by the *emmeans* package of the R statistical programming environment (v4.0.3),  $P$  values and confidence intervals were adjusted with the Tukey method.
